# Supplementary material for: Biocompatible organic–inorganic hybrid materials based on nucleobases and titanium developed by molecular layer deposition
Source: PubMed Central journal article supplement (PMC6369986; doi:10.3762/bjnano.10.39), 2019-02-08
Supplement: Beilstein_J_Nanotechnol-10-399-s001.pdf [file Beilstein_J_Nanotechnol-10-399-s001.pdf]

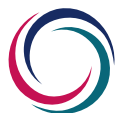

## Supporting Information

for

### **Biocompatible organic–inorganic hybrid materials based on nucleobases and titanium developed by molecular layer deposition**

Leva Momtazi, Henrik H. Sønsteby and Ola Nilsen

*Beilstein J. Nanotechnol.* **2019**, *10*, 399–411. [doi:10.3762/bjnano.10.39](https://doi.org/10.3762/bjnano.10.39)

## Additional figures and tables

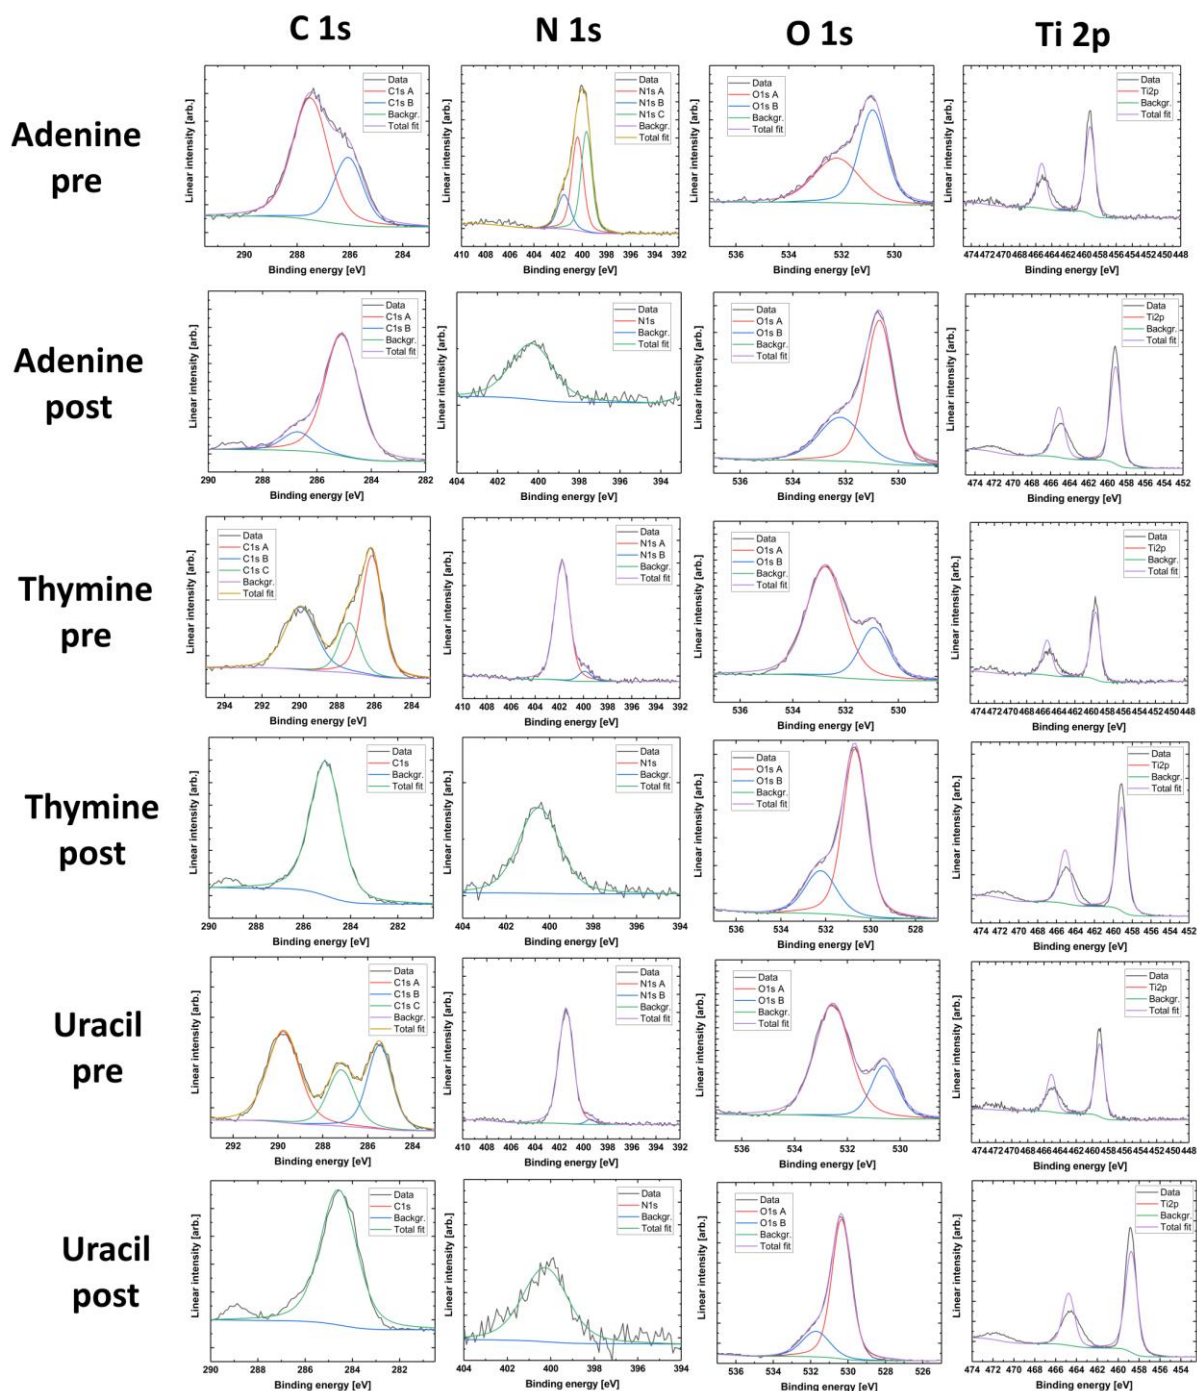

Figure S1: Carbon 1s, nitrogen 1s, oxygen 1s and titanium 2p XPS data with accompanying peak fits (Avantage), for adenine, thymine and uracil hybrid Ti-films prior to and post water treatment.

**Table S1: Elemental analysis in the top layer of the hybrid Ti-films of adenine, thymine and uracil prior to and post water treatment, as measured by XPS.**

|                  | Adenine pre [%] | Adenine post [%] | Thymine pre [%] | Thymine post [%] | Uracil pre [%] | Uracil post [%] |
|------------------|-----------------|------------------|-----------------|------------------|----------------|-----------------|
| Carbon (C 1s)    | 43.1            | 36.87            | 49.46           | 31.02            | 44.71          | 29.24           |
| Nitrogen (N 1s)  | 33.82           | 2.24             | 18.50           | 3.18             | 20.79          | 1.50            |
| Oxygen (O 1s)    | 17.32           | 46.46            | 27.95           | 49.74            | 30.25          | 51.45           |
| Titanium (Ti 2p) | 5.76            | 14.43            | 4.09            | 16.06            | 4.25           | 17.81           |

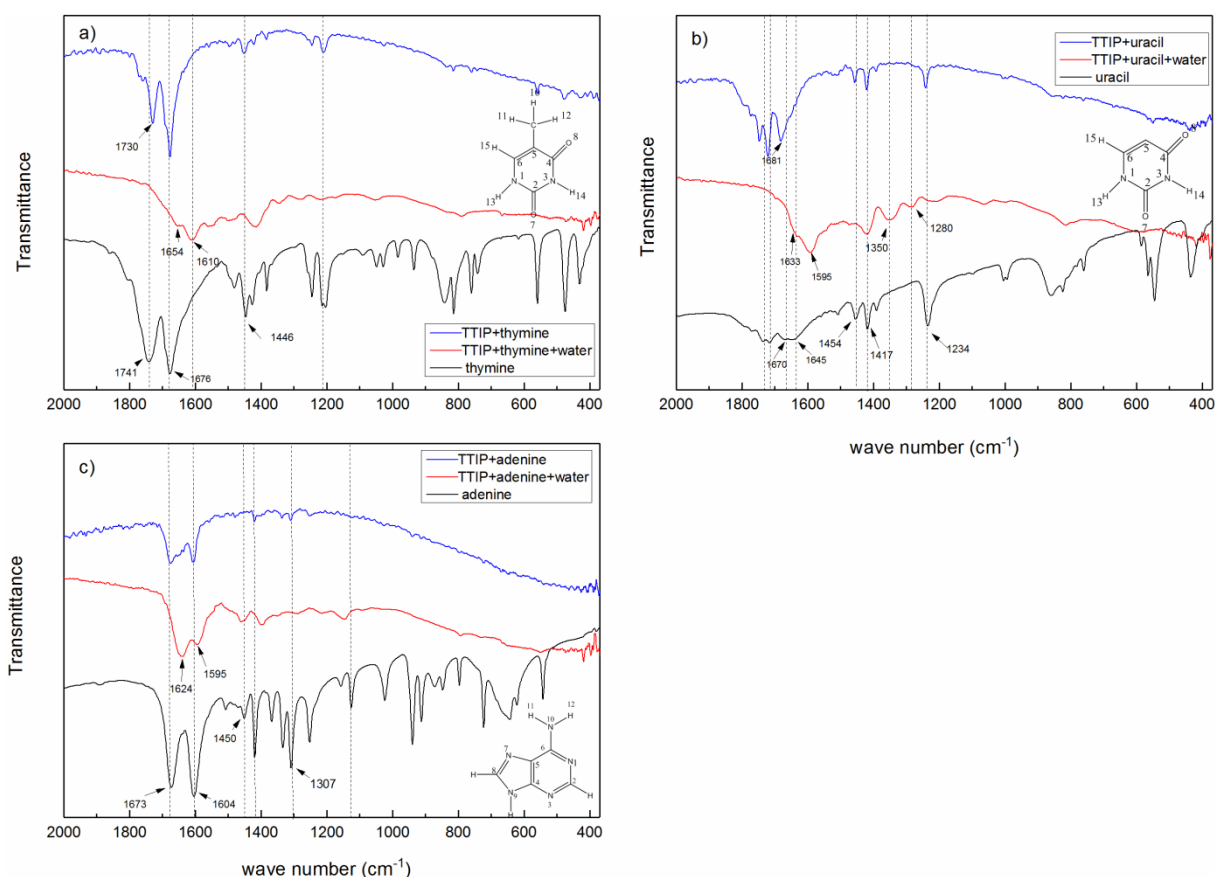

**Figure S2: FTIR spectra of (a) thymine powder (black line), hybrid film based on TTIP/p/thymine/p/water/p pulse sequence (red line) and hybrid film based on TTIP/p/thymine/p pulse sequence (blue line) (b) uracil powder (black line), hybrid film based on TTIP/p/uracil/p/water/p pulse sequence (red line) and hybrid film based on TTIP/p/uracil/p pulse sequence (blue line) (c) adenine powder (black line), hybrid film based on TTIP/p/adenine/p/water/p pulse sequence (red line) and hybrid film based on TTIP/p/adenine/p pulse sequence (blue line)**

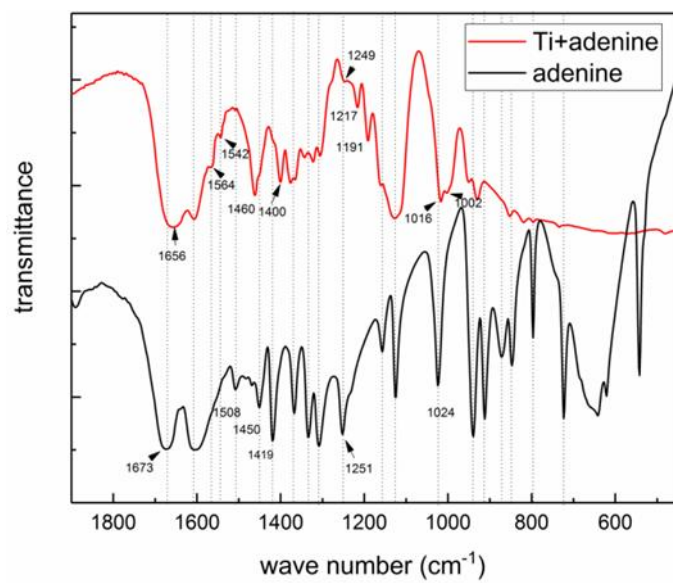

Figure S3: FTIR spectra of adenine pressed in KBr pellet (black line) and Ti-adenine complex (red line).
